# Supplementary material for: Differential Structural Development of Adult-Born Septal Hippocampal Granule Cells in the Thy1-GFP Mouse, Nuclear Size as a New Index of Maturation
Source: PLoS One. 2015 Aug 12;10(8):e0135493. doi: 10.1371/journal.pone.0135493 (PMC4534292; doi:10.1371/journal.pone.0135493)
Supplement: S1 Fig — The supporting information file contains the detailed information for the statistical material (individual animals and numbers) presented in each figure. All of these data are illustrated in the figures. (XLSX) [file pone.0135493.s001.xlsx]

## Sheet: fig2c
	Mean (%)	SEM	N
7 dpi	100	17.51	3
14 dpi	64.89	9.32	3
21 dpi	56.91	10.15	3
28 dpi	39.36	5.074	3
35 dpi	14.36	6.041	3
49 dpi	21.28	5.629	3
63 dpi	17.55	6.041	3
77 dpi	17.55	5.754	3

## Sheet: fig2d
	Mean (%)	SEM	N
7 dpi	91.32	3.49	3
14 dpi	83.79	8.38	3
21 dpi	70.96	11.66	3
28 dpi	35.39	1.06	3
35 dpi	0	0	3
49 dpi	0	0	3
63 dpi	0	0	3
77 dpi	0	0	3

## Sheet: fig3b
	7 dpi			14 dpi			21 dpi			28 dpi
Stage	Mean (#/mm)	SEM	N	Mean (#/mm)	SEM	N	Mean (#/mm)	SEM	N	Mean (#/mm)	SEM	N
1	2.90827	0.507276	3	0.233918	0.232754	3	0.115213	0.116377	3	0	0	3
2	3.2574	0.81464	3	0.464345	0.116377	3	0.115213	0.116377	3	0	0	3
3	1.74566	0.533307	3	0.233918	0.232754	3	0	0	3	0.115213	0.116377	3
4	1.39653	0.533307	3	0.349131	0.201571	3	0.115213	0.116377	3	0	0	3
5	0.813477	0.465509	3	3.60653	0.581886	3	0.932181	0.507276	3	0	0	3
6	0.349131	0.201571	3	1.28131	0.419604	3	2.09479	0.726775	3	1.16261	0.116377	3

## Sheet: fig3c
	7 dpi			14 dpi			21 dpi			28 dpi
Stage	Mean (%)	SEM	N	Mean (%)	SEM	N	Mean (%)	SEM	N	Mean (%)	SEM	N
1	29.2064	5.56914	3	3.33333	3.33333	3	2.22222	2.22222	3	0	0	3
2	30.5556	3.09931	3	7.37745	1.31556	3	2.22222	2.22222	3	0	0	3
3	16.5873	2.94935	3	3.33333	3.33333	3	0	0	3	8.33333	8.33333	3
4	12.7778	4.76257	3	5.58824	3.40889	3	2.22222	2.22222	3	0	0	3
5	6.8254	2.57295	3	60.1961	12.6623	3	20.5556	12.0313	3	0	0	3
6	4.04762	2.11624	3	20.1716	5.31185	3	72.7778	13.6196	3	91.6667	8.33333	3

## Sheet: fig3d
	7 dpi	14 dpi	21 dpi	28 dpi
Stage	Mean (%)	Mean (%)	Mean (%)	Mean (%)
1	84.02	9.59	6.39	0
2	76.09	18.37	5.53	0
3	58.71	11.8	0	29.49
4	62.06	27.14	10.79	0
5	7.79	68.74	23.47	0
6	2.15	10.69	38.58	48.59

## Sheet: fig3e
	7 dpi	14 dpi	21 dpi	28 dpi
Stage	Mean (%)	Mean (%)	Mean (%)	Mean (%)
1-3	74	13.61	4.31	8.08
4-6	7.97	28.96	32.19	30.88

## Sheet: fig4b
Stage	Mean (µm²)	SEM	N
1	11.79	1.0599	5
2	17.23	1.04696	7
3	21.05	1.49	4
4	24.15	1.96776	6
5	30.56	2.74667	9
6	42.08	3.47643	11

## Sheet: fig4c
Stage	Mean (µm²)	SEM	N
7	18.75	0.607725	3
14	24.65	1.19981	3
21	33.46	3.8868	3
28	41.08	1.82472	3
35	47.03	1.53553	3
49	46.72	1.19003	3
63	48.52	3.54199	3
77	46.32	1.56068	3

## Sheet: fig4d
Position (%)
Stage 1	Stage 2	Stage 3	Stage 4	Stage 5	Stage 6
0	0	6.59779	18.2553	0	10.8404
6.00839	0	0	13.5419	0	52.6093
6.56916	0	0	0	23.4642	0
0	5.46491	0	3.48551	11.2301	15.2578
0	0	0	0	0	26.0239
0	18.7378	4.86248	0	7.78468	10.0952
0	0	0	14.5389	0	5.30135
6.59934	0	0	0	0	11.7769
5.89098	4.65984	0	0	4.87962	44.4239
0	3.6657	0	6.36074	15.9405	0
0	0	0	0	5.9428	0
0	0	0	0	12.1326	3.78988
0	0	3.31369	0	0	7.83323
0	0	5.14526	0	14.0561	4.41456
0	0	0	0	0	5.47082
0	0	0	0	0	0
0	2.09909	2.97708	0	0	0
0	0			0	0
6.89582	0			0	0
0	0			6.51621	0
4.89046	0			4.15996	28.4962
0	0			19.8197	0
0	0			20.6611	31.61
6.63882	0			0	0
0	0			0	10.865
0	5.13227			5.42014	4.89153
0	0			34.3848	4.09393
0	0			0	5.3735
	0			0	0
	0			8.80356	0
	0			0	23.5921
	0			8.39803	0
	0			5.30098	5.80464
				0	0
				0	21.9306
				0	0
				11.6347	0
				7.76759	12.5796
				0	0
				11.3015	34.4861
				0
				13.4441
				8.92671
				27.6532

## Sheet: fig4e
Position (%)
7 dpi	14 dpi	21 dpi	28 dpi	35 dpi	49 dpi	63 dpi	77 dpi
0	0	0	11.5306	21.6693	13.7917	0	9.07049
0	9.07867	0	0	11.4133	13.1945	5.25638	0
0	0	4.41456	16.0147	0	3.90224	2.53167
18.2553	0	5.47082	18.8289	79.3925		33.5446
0	0	0	5.63585	0	15.6354
13.5419		0		0	28.7366		10.3489
0	8.97354	0	0				0
0	0	0	0		13.9222
0	8.07711	10.1228	5.20777	0
	0	6.95335	7.43743	16.0979		0	0
0	0		5.80464	10.9159	0	0	11.9766
0	0	48.4571	28.5874				0
0			3.00711			14.2988	10.3933
0	15.2578		5.62174			21.3337	0
0	4.87962		5.37359	0			10.2785
5.46491	26.0239	19.3977				0
6.59779	15.9405	0	10.6734	0		9.71195
8.90306	5.9428		9.56453	7.25672	0	71.3882
	5.92762	5.46986		0	0	5.34685
0	12.1326	4.52379	0		0	0
0	0		11.3526	19.0039	0	0
0	14.0561	3.68736	12.4894	0	13.5729		30.5813
7.56561		5.44514		0	10.657		0
0	0	0	12.2423	3.30852	33.5021	0
6.00839	0	0	0		11.6594	0	0
0	0	0			0	7.09083	0
18.7378		0	0		11.0713		16.983
3.48551					4.80794
0			0	0	14.1367		0
	0		0			2.84644
	0		0	0	0	16.3611
10.8404	0			3.17687	0
0			0
0		0	0
0	0	3.41627	0			0
52.6093						0
	0		0	14.8261	9.90179	13.0971
8.63367			0		37.0615
0	10.0498					8.0459
6.56916	0			0	2.01439	0
5.59008					12.4085	0
0				15.6277	25.3522	7.73017
0					0
0		0		8.38445		0	0
0		11.6347	10.4535	17.2665	10.8091	0	0
0	0	0	0				8.83966
	0	11.3546	22.3107				0
0	0	8.8131		0	0	7.38483
0	10.0952				0	48.5002	41.237
4.65984	6.70033	7.76759	8.96547				0
6.91509	10.9801	4.4446	0		7.59166		82.4274
0		0			0	0
0	0	0	17.4501		3.8208	5.99107	24.3825
	0	4.54457	37.5638		0		12.9759
	5.44724	0	8.54324		7.15766		44.6912
3.6657	5.30135	0	0				19.885
0	7.93674	0	6.02828
	5.81394	0	21.9306
0			0				0
0	6.71432		0
0	0	0	0				23.6105
0	11.7769
0	0	0					35.8234
		2.8693			0
0		18.5832			0
6.65179	0	6.83936	0				10.7843
3.90954	0	0	0		23.7262		9.05964
0	0	32.6617	0		14.2108
0	0	3.42065	0		0		11.623
0	2.97708				0
0		12.9256	0		0
5.70187		0
	0	0
	0	0
	0	0
	44.4239	0			0
	6.51621	0	7.95653
	4.15996		11.3709		0
0	0	11.3015
0		0	0
14.5389	19.8197	0	0
0	0		0
0	0	0
	0	0	0
0		0
0
0
0	0	28.4962
6.34016	0	0
0	0	0
	0	0	10.2099
0	0	0	7.54685
0	20.6611	0	27.6532
0	3.57761		0
9.29593	0
0			12.5796
0	0		21.103
0	0		0
5.02852	0		20.518
0	0	0
0		5.42577	53.3346
4.86248	0	6.91123
0	0	4.70346
0	0	31.61	0
0			0
0		0	6.79671
3.88833		7.93495	34.4861
17.4616		4.02369	0
		0
		0	33.6901
23.4642	0	0	5.77095
0	0	9.95733	0
0	0	0
3.37799	5.42014	10.865	49.3164
11.1252	0	10.4677
	34.3848	0
0	0	0
2.74167			0
0	0	4.22746
6.59934	0	0	0
0	0	4.769
0	4.72266	4.89153
5.89098	7.95495	5.62636
6.85284	2.26325	4.09393
0	3.76653	11.8313
0	4.86942
0	0
2.09909		4.676
0		0
11.2301		0
0		0
0	0	5.3735
0	8.80356
0	6.41312	0
	0	0
0	8.39803	0
	2.91802	0
0	16.2514	0
7.42818	3.88765
0	0
0	3.78988	0
0	5.62148	0
0	8.75566	0
0	18.8468	0
0	0
0	9.42277	23.5921
0		0
6.36074	0	13.4441
0	0
0	0	8.92671
0	5.30098	0
	0
0	3.5083
0
0
0	0
0
0
0
0	0
0	7.83323
0	5.21364
0	0
	0
0
0
0
0
0
0
0
17.0619
0
0
0
0
10.397
0
17.207
6.89582
3.31369
5.14526
0
0
0
4.89046
0
9.02911
11.2163
0
0
0
0
5.13227
3.74984
0
6.02313
0
0
0
0
0
6.63882
0
8.25248
0
0
0
0
7.78468
0
0
0
0

[truncated: 6 more sheets: fig5a, fig5b, fig5c, fig5d, fig5e, fig5f]
